# Supplementary material
Source: ML conference proceedings conference paper supplement (https://openaccess.thecvf.com/content/CVPR_2020/html/Yu_Deformable_Siamese_Attention_CVPR_2020_paper.html)
Supplement: Supplementary file 1 [file Yu_Deformable_Siamese_Attention_CVPR_2020_supplemental.pdf]

# Deformable Siamese Attention Networks for Visual Object Tracking – Supplementary Materials

Yuechen Yu, Yilei Xiong, Weilin Huang, Matthew R. Scott  
Malong Technologies

{rogyu, yilxiong, whuang, mscott}@malong.com

## S1. Qualitative Results

Qualitative results of SiamAttn for VOT2018 sequences are shown in Fig. 1. It shows that SiamAttn is capable of tracking and segmenting most objects that have different sizes, motions, deformations and complex background, *etc.*

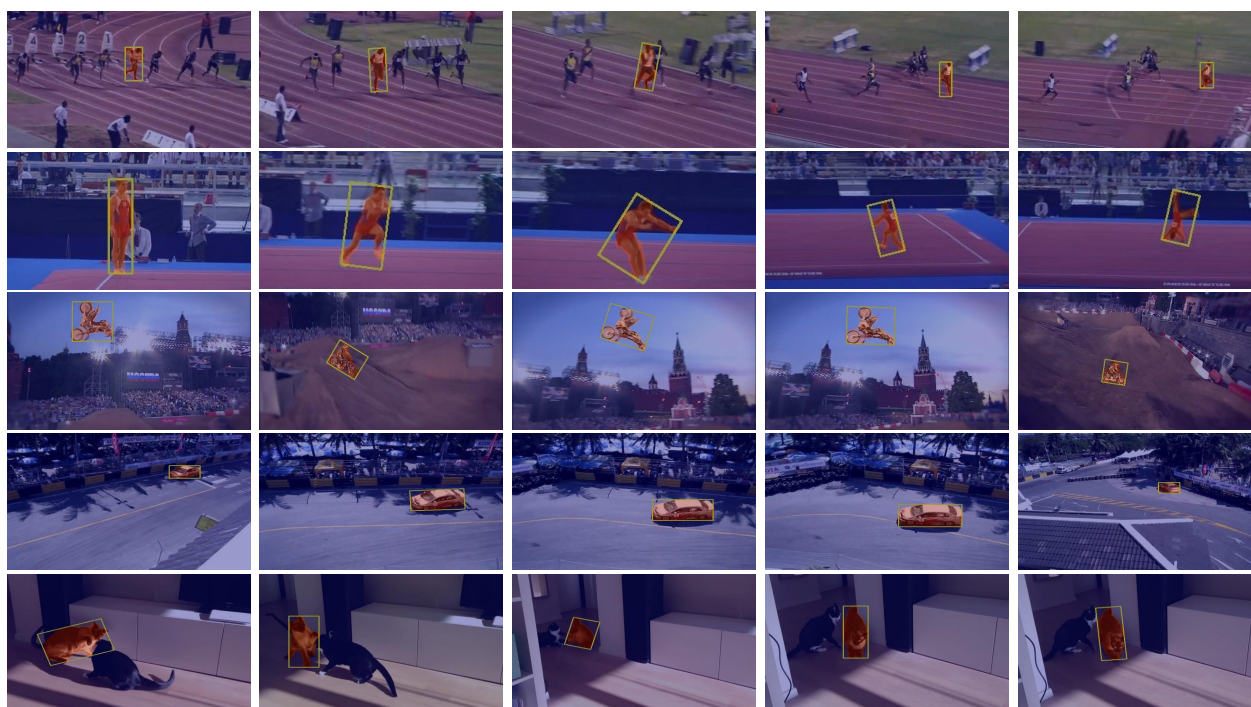

Figure 1. Qualitative results of SiamAttn on sequences from the visual object tracking benchmark VOT2018.
